# Supplementary material
Source: publisher figshare collection journal article supplement (https://diabetesjournals.figshare.com/ndownloader/files/35876972)
Supplement: Supplementary file 1 [file 35876972]

**Supplemental material for the manuscript:**

Autoantibodies to Perilipin-1 define a subset of acquired generalized lipodystrophy

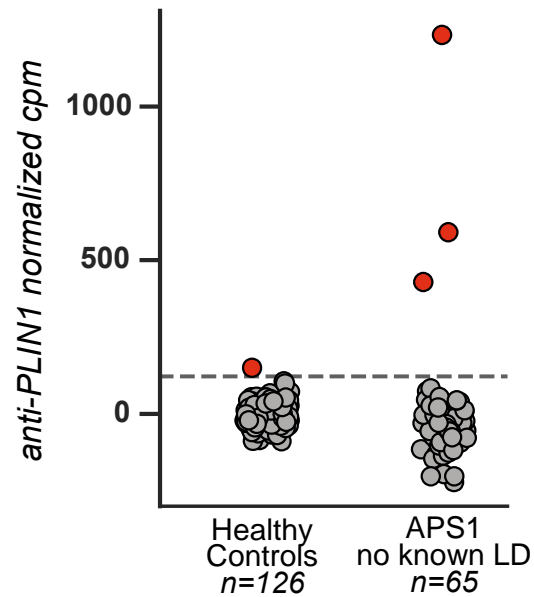

**Supplemental Figure S1. RLBA detection of autoantibodies to PLIN1.** Radioligand binding assay for detection of anti-PLIN1 antibodies in an independent, additional cohort of APS1 and healthy controls. Radiolabeled PLIN1 protein was incubated with sera from healthy controls (HC, n = 126) or from APS1 patients without known lipodystrophy (APS1, n = 65). Dotted line indicates mean + 3SD of healthy controls.

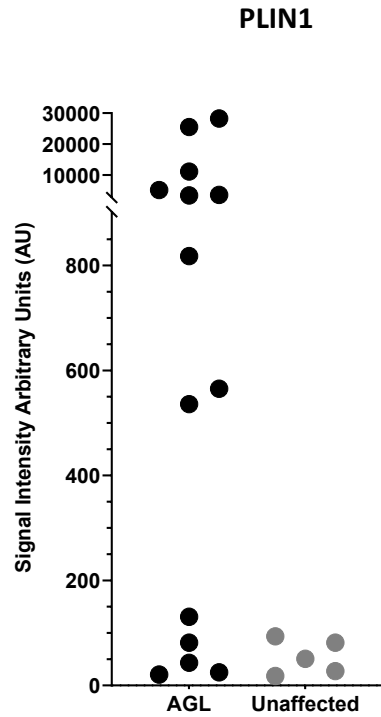

**Supplemental Figure S2. Immunoglobulin G reactivity for AGL patients and normal control samples on HuProt array.** Comparison of signal intensities for IgG PLIN1 autoantibody in individual AGL patients and normal controls. Sera from the patients with AGL showed overall 26-fold higher PLIN1 signal intensity for IgG antibody compared to normal subjects ( $p=0.0013$ ).
